# Supplementary material for: New copper(ii) complexes of the anti-inflammatory drug mefenamic acid: a concerted study including synthesis, physicochemical characterization and their biological evaluation
Source: Royal Society of Chemistry journal article supplement (doi:10.1039/c6ra14706b), 2016-01-01
Supplement: c6ra14706b1.pdf [file c6ra14706b1.pdf]

## **New copper(II) complexes of anti-inflammatory drug mefenamic acid: a concerted study including synthesis, physicochemical characterization and their biological evaluation**

Raj Pal Sharma,<sup>a,\*</sup> Santosh Kumar,<sup>a</sup> Paloth Venugopalan,<sup>a</sup> Valeria Ferretti,<sup>b,\*</sup> Alketa Tarushi,<sup>c</sup> George Psomas <sup>c\*</sup> and Maciej Witwicki<sup>d</sup>

<sup>a</sup>*Department of Chemistry, Panjab University, Chandigarh-160014, India.*

<sup>b</sup>*Center for Structural Diffractometry and Department of Chemical and Pharmaceutical Sciences, University of Ferrara, via Fossato di Mortara 17-27, I-44100, Ferrara, Italy.*

<sup>c</sup>*Laboratory of Inorganic Chemistry, Department of General and Inorganic Chemistry, Faculty of Chemistry, Aristotle university of Thessaloniki, GR-54124 Thessaloniki, Greece.*

<sup>d</sup>*Faculty of Chemistry, Wroclaw University, 14 F. Joliot-Curie St., Wroclaw 50-283, Poland.*

### S1. Interaction with CT DNA

The DNA-binding constant complexes **1–3** ( $K_b$ , in  $M^{-1}$ ) may be obtained by monitoring the changes in the absorbance at the corresponding  $\lambda_{max}$  in the UV-Vis spectra with increasing concentrations of CT DNA.  $K_b$  is given by the ratio of slope to the y intercept in plots  $\frac{[DNA]}{(\epsilon_A - \epsilon_f)}$  versus  $[DNA]$ , according to the Wolfe–Shimer equation [1]:

$$\frac{[DNA]}{(\epsilon_A - \epsilon_f)} = \frac{[DNA]}{(\epsilon_b - \epsilon_f)} + \frac{1}{K_b(\epsilon_b - \epsilon_f)} \quad (\text{eq. S1})$$

where  $[DNA]$  is the concentration of DNA in base pairs,  $\epsilon_A = A_{obsd}/[\text{compound}]$ ,  $\epsilon_f$  = the extinction coefficient for the free compound and  $\epsilon_b$  = the extinction coefficient for the compound in the fully bound form.

### S2. Competitive studies with EB

The Stern–Volmer constant  $K_{SV}$  (in  $M^{-1}$ ) is used to evaluate the quenching efficiency for each compound according to the Stern–Volmer equation [2]:

$$\frac{I_0}{I} = 1 + K_{SV}[Q] \quad (\text{eq. S2})$$

where  $I_0$  and  $I$  are the emission intensities in the absence and the presence of the quencher, respectively,  $[Q]$  is the concentration of the quencher (i.e. complexes **1–3**);  $K_{SV}$  is obtained from the Stern–Volmer plots by the slope of the diagram  $\frac{I_0}{I}$  versus  $[Q]$ .

### S3. Interaction with serum albumins

The extent of the inner-filter effect can be roughly estimated with the following formula:

$$I_{corr} = I_{meas} \times 10^{\frac{\epsilon(\lambda_{exc})cd}{2}} \times 10^{\frac{\epsilon(\lambda_{em})cd}{2}} \quad (\text{eq. S3})$$

where  $I_{corr}$  = corrected intensity,  $I_{meas}$  = the measured intensity,  $c$  = the concentration of the quencher,  $d$  = the cuvette (1 cm),  $\epsilon(\lambda_{exc})$  and  $\epsilon(\lambda_{em})$  = the  $\epsilon$  of the quencher at the excitation and the emission wavelength, respectively, as calculated from the UV-vis spectra of the complexes [3].

The Stern–Volmer and Scatchard graphs are used in order to study the interaction of a quencher with serum albumins. According to Stern–Volmer quenching equation [2]:

$$\frac{I_0}{I} = 1 + k_q \tau_0 [Q] = 1 + K_{SV}[Q] \quad (\text{eq. S4}),$$

where  $I_0$  = the initial tryptophan fluorescence intensity of SA,  $I$  = the tryptophan fluorescence intensity of SA after the addition of the quencher,  $k_q$  = the quenching rate constants of SA,  $K_{SV}$  =

the dynamic quenching constant,  $\tau_0$  = the average lifetime of SA without the quencher,  $[Q]$  = the concentration of the quencher, the dynamic quenching constant ( $K_{SV}$ ,  $M^{-1}$ ) can be obtained by the slope of the diagram  $\frac{I_0}{I}$  versus  $[Q]$ . From the equation:

$$K_{SV} = k_q \tau_0 \quad (\text{eq. S5})$$

and taking  $\tau_0 = 10^{-8}$  s as fluorescence lifetime of tryptophan in SA, the approximate quenching constant ( $k_q$ ,  $M^{-1}s^{-1}$ ) is calculated.

From the Scatchard equation [2]:

$$\frac{\Delta I / I_0}{[Q]} = nK - K \frac{\Delta I}{I_0} \quad (\text{eq. S6})$$

where  $n$  is the number of binding sites per albumin and  $K$  is the association binding constant,  $K$  (in  $M^{-1}$ ) is calculated from the slope in plots  $\frac{\Delta I / I_0}{[Q]}$  versus  $\frac{\Delta I}{I_0}$  and  $n$  is given by the ratio of y intercept to the slope [2].

## References

- [1] A. Wolfe, G. Shimer and T. Meehan, *Biochemistry* 1987, **26**, 6392.
- [2] Y. Wang, H. Zhang, G. Zhang, W. Tao and S. Tang, *J. Luminescence* 2007, **126**, 211.
- [3] L. Stella, A.L. Capodilupo and M. Bietti, *Chem. Commun.* 2008, 4744.

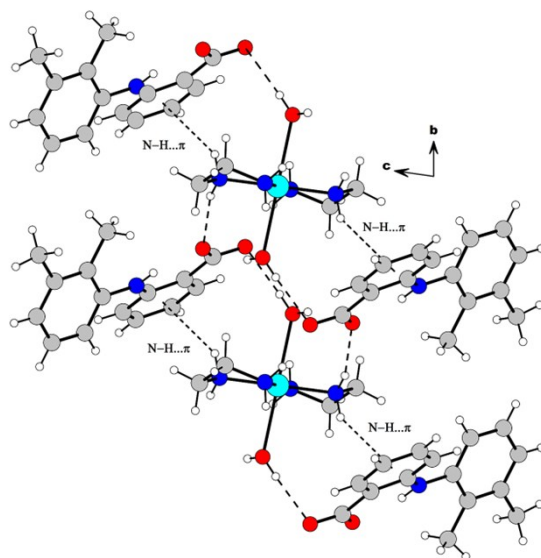

**Figure S1.** Packing diagram of complex **2**, stabilized by various non-covalent interactions such as N-H... $\pi$ , O-H...O and N-H...O hydrogen bonding interactions.

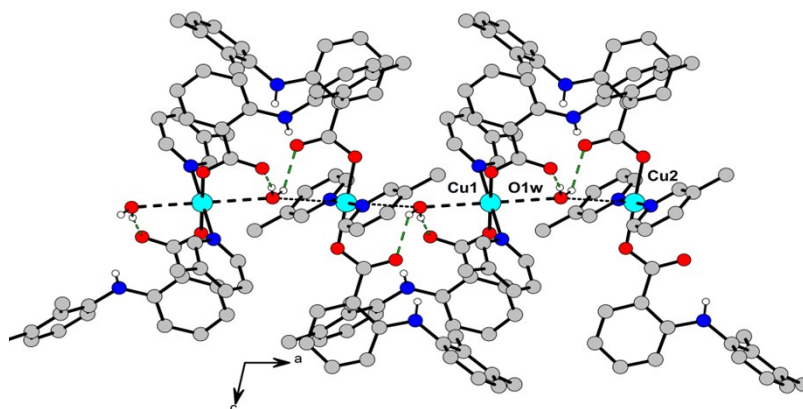

**Figure S2.** Chain of [Cu(β-pic)<sub>2</sub>(mef)<sub>2</sub>] in complex **3** running along the *a* axis (Cu...Ow contacts and Ow-H...O hydrogen bonds are shown as black and green broken bonds, respectively)

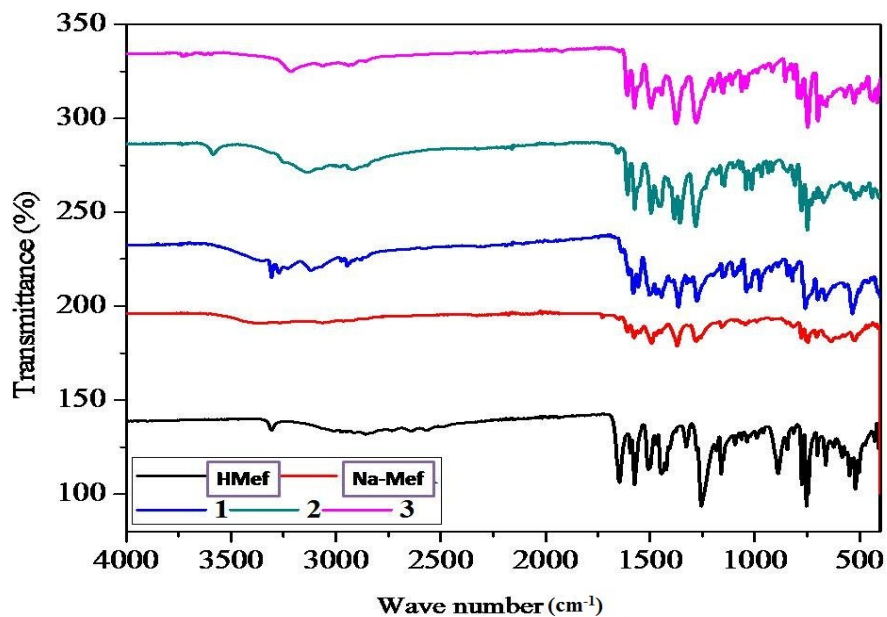

**Figure S3.** FT-IR spectra of complexes **1-3** in comparison with mefenamic acid and sodium salt of mefenamic acid.

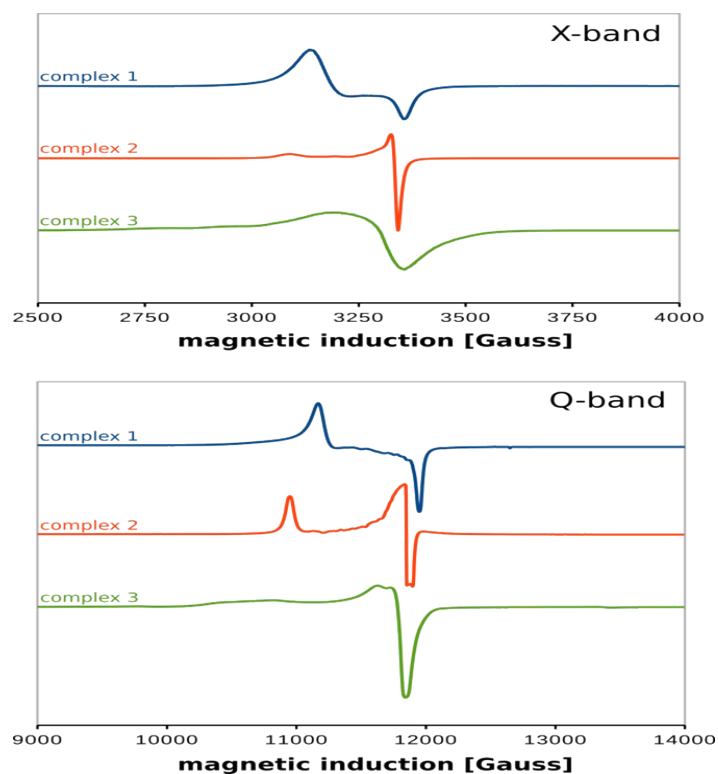

**Figure S4.** X- (9.6 GHz) and Q-band (34 GHz) EPR spectra of powdered complex **1**, **2** and **3** at 77 K (X-band) and 100 K (Q-band). The parameters are given in the text.

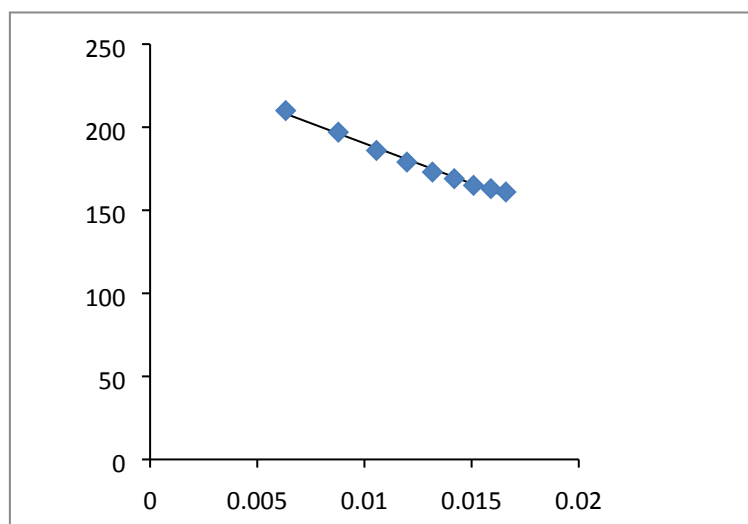

**Figure S5.** Plot of K (molar conductance) versus  $C^{1/2}$  (square root of concentration) of complex **2**.

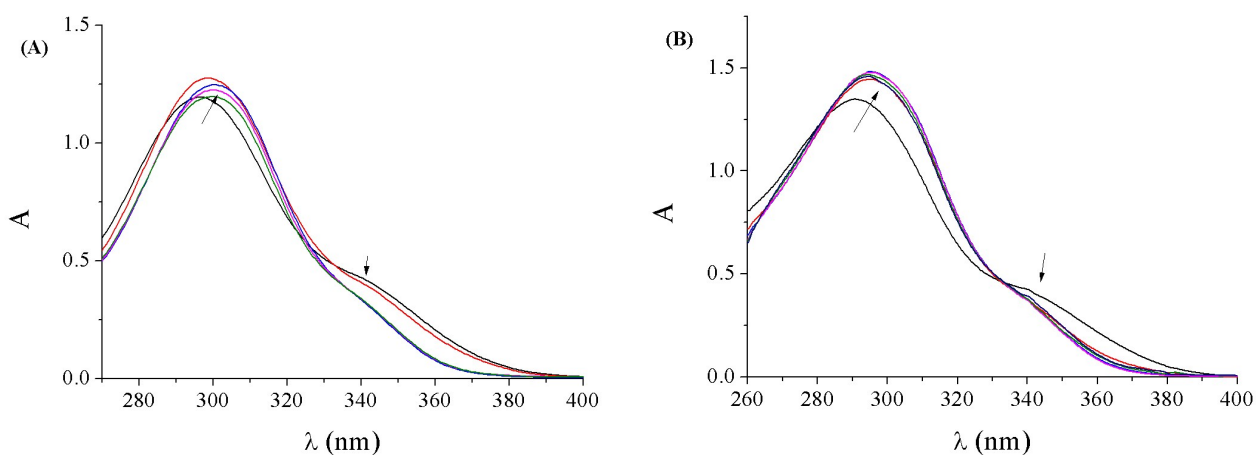

**Figure S6.** UV-Vis spectra of DMSO solution of complex (A) **1** ( $3 \times 10^{-5}$  M) and (B) **2** ( $4 \times 10^{-5}$  M) in the presence of increasing amounts of CT DNA ( $r' = [\text{DNA}]/[\text{compound}] = 0\text{--}0.8$ ). The arrows show the changes upon increasing amounts of CT DNA.

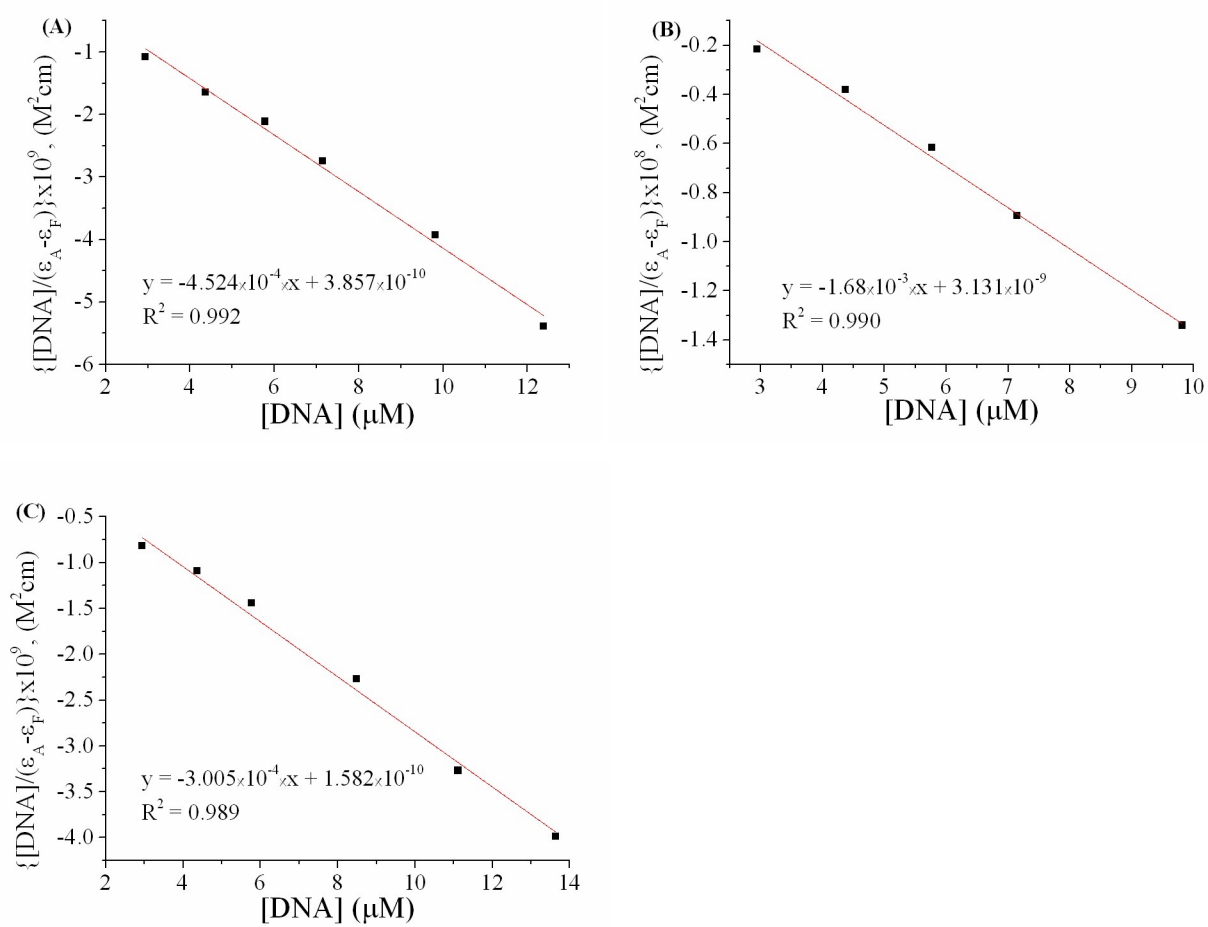

**Figure S7.** (A)–(C) Plot of  $\frac{[DNA]}{(\epsilon_A - \epsilon_F)}$  versus  $[DNA]$  for complexes **1–3**, respectively.

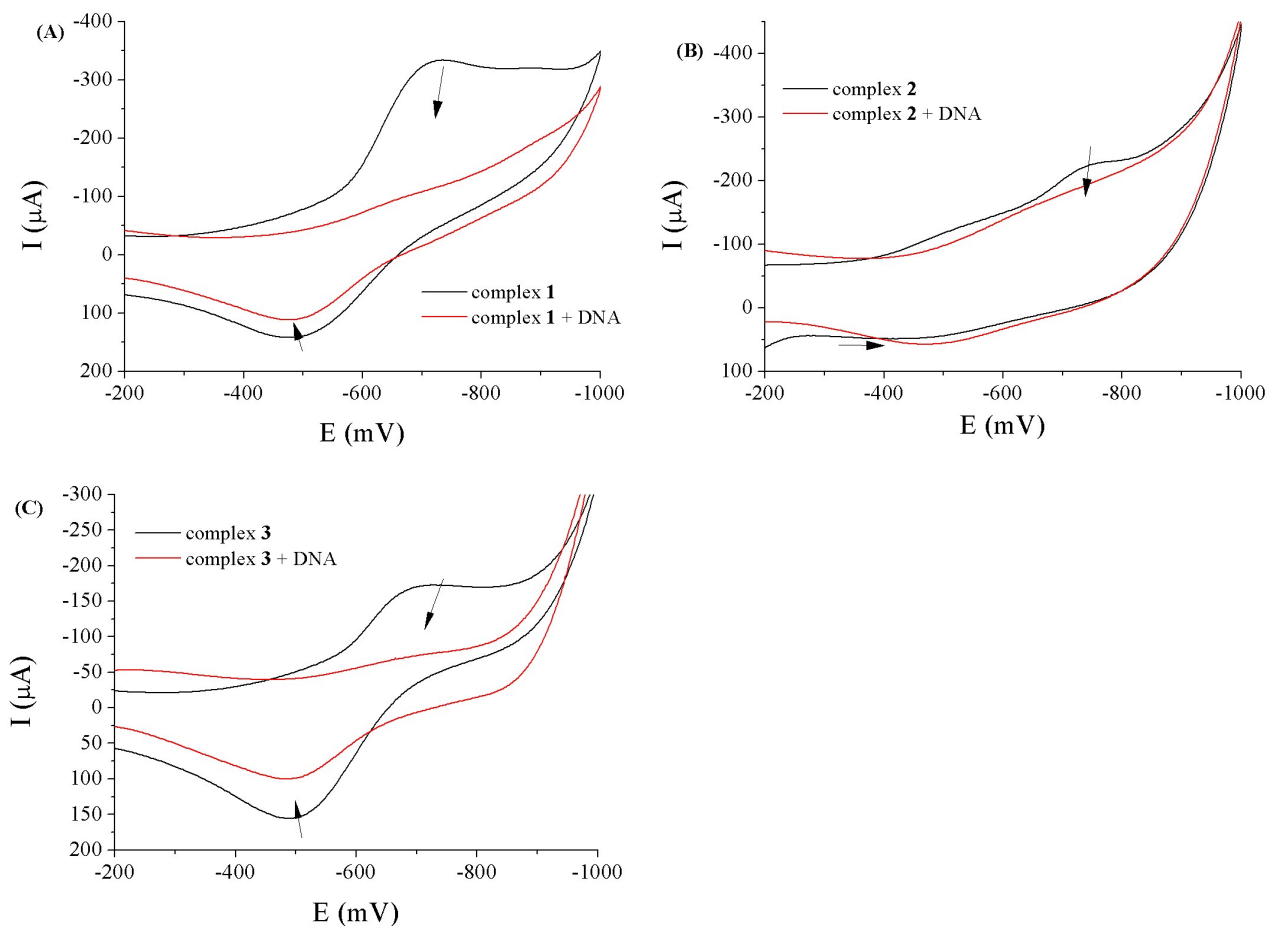

**Figure S8.** Cyclic voltammogram of 0.33 mM 1/2 DMSO/buffer (containing 150 mM NaCl and 15 mM trisodium citrate at pH 7.0) solution of complex (A) **1**, (B) **2** and (C) **3** in the absence or presence of CT DNA. Scan rate = 100 mV s<sup>-1</sup>. Supporting electrolyte = buffer solution.



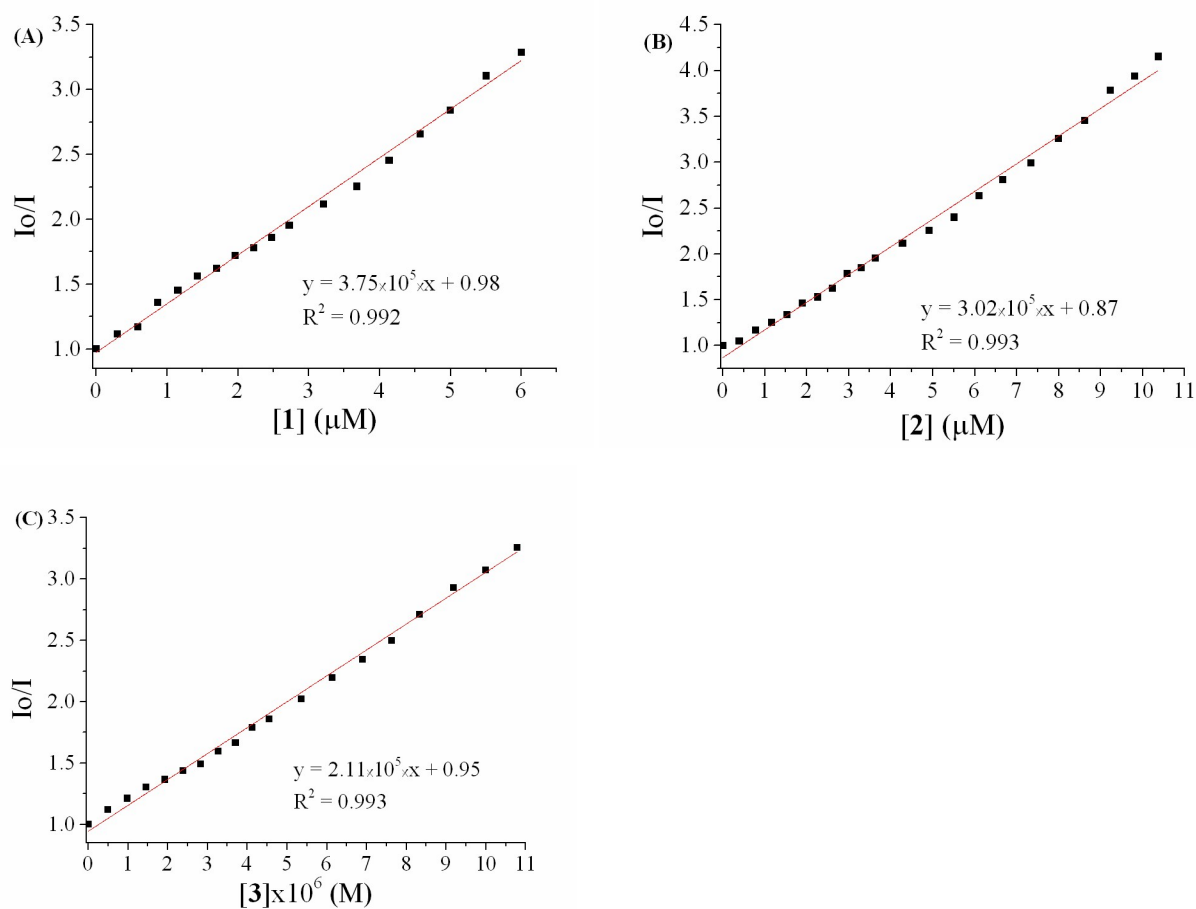

**Figure S9.** (A)–(C) Stern–Volmer quenching plot of EB bound to CT DNA for complexes **1**–**3**, respectively.

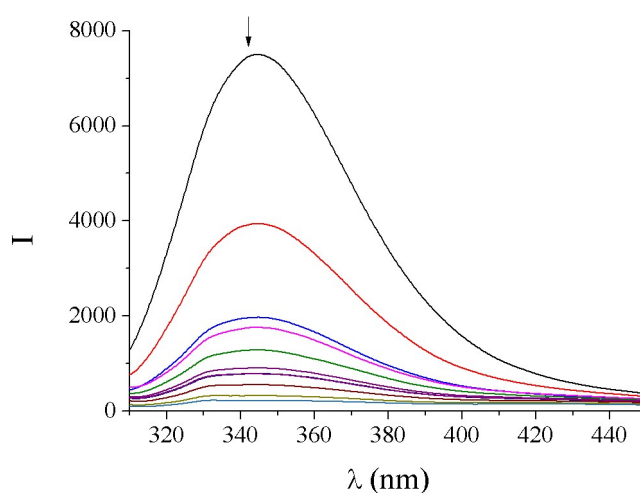

**Figure S10.** Fluorescence emission spectra ( $\lambda_{\text{exc}} = 295 \text{ nm}$ ) for BSA ( $[BSA] = 3 \mu\text{M}$ ) in buffer solution in the absence and presence of increasing amounts of **2** ( $r = [2]/[BSA] = 0\text{--}7.3$ ). The arrow shows the changes of intensity upon increasing amounts of the complex.

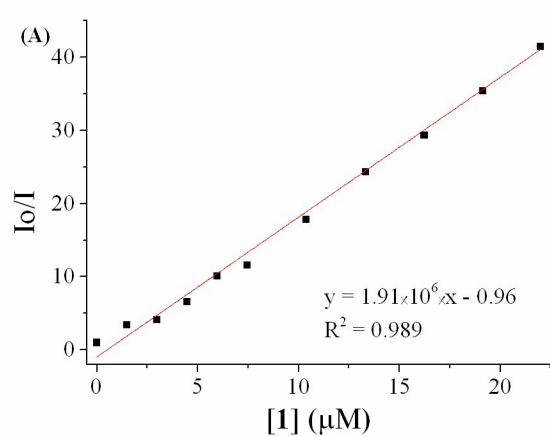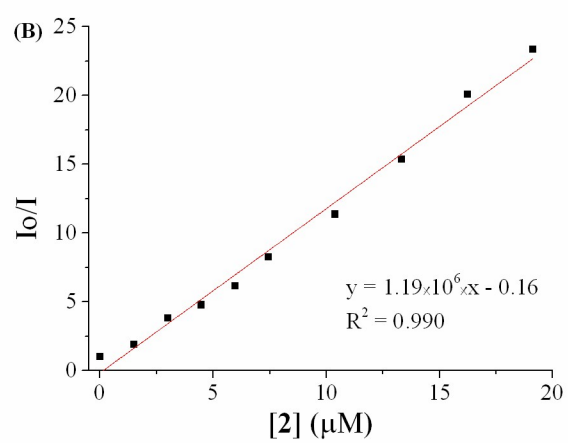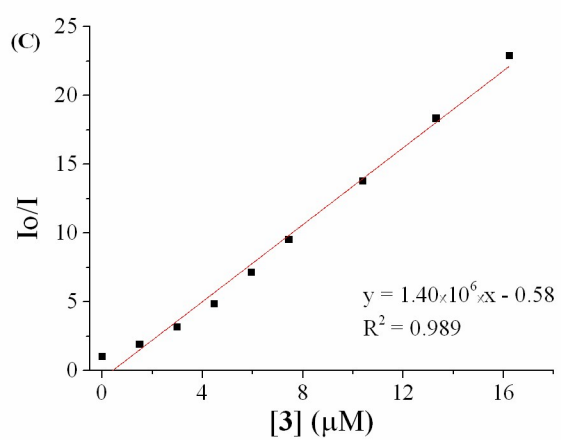

**Figure S11.** (A)–(C) Stern–Volmer quenching plot of BSA for complexes **1**–**3**, respectively.

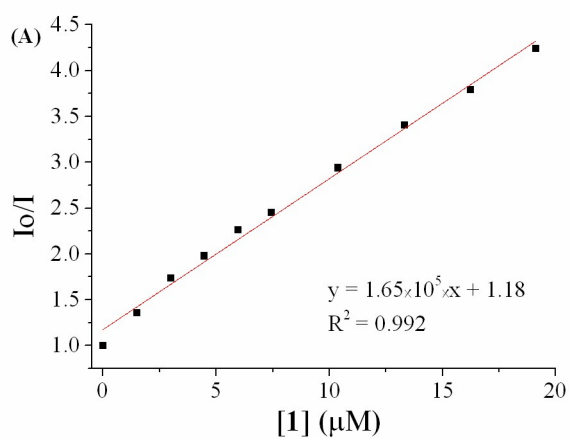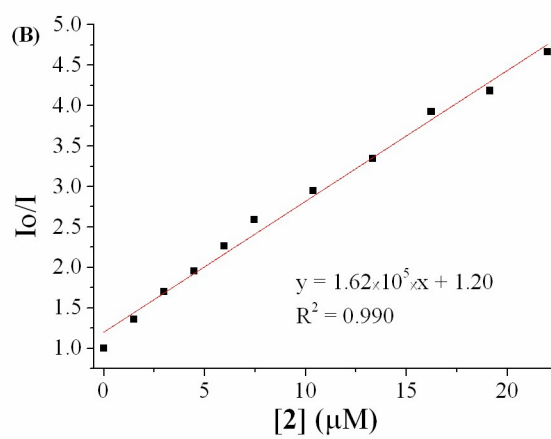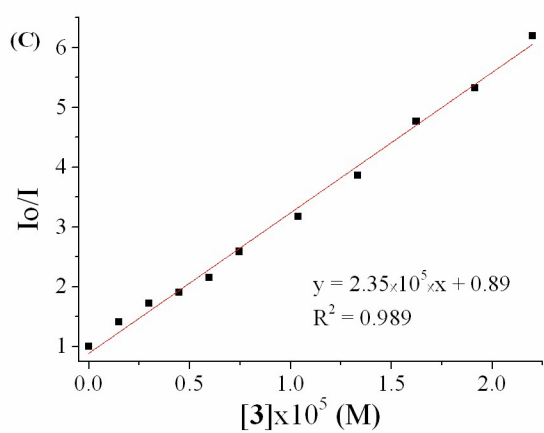

**Figure S12.** (A)–(C) Stern–Volmer quenching plot of HSA for complexes **1–3**, respectively.

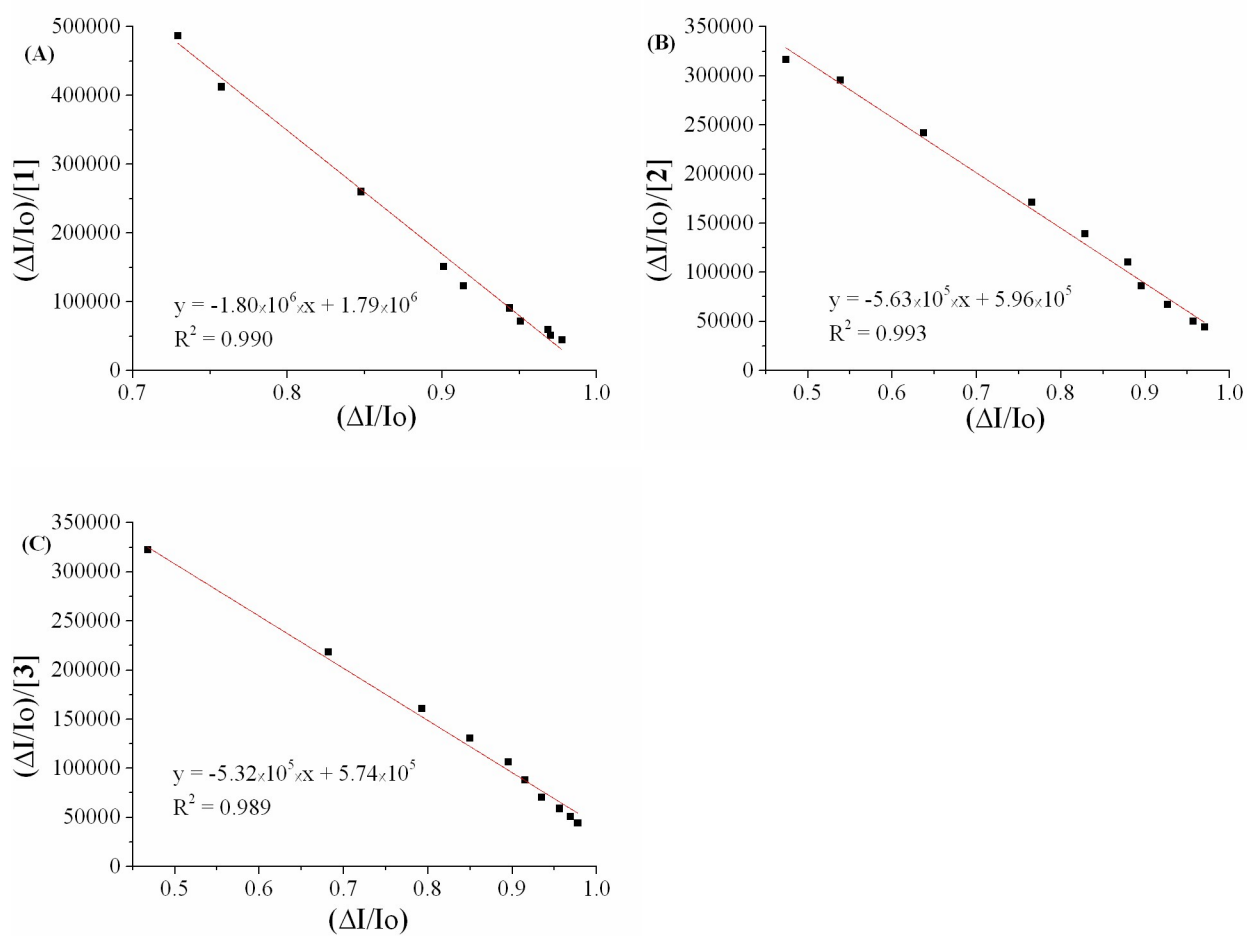

**Figure S13.** (A)–(C) Scatchard plot of BSA for complexes **1–3**, respectively.

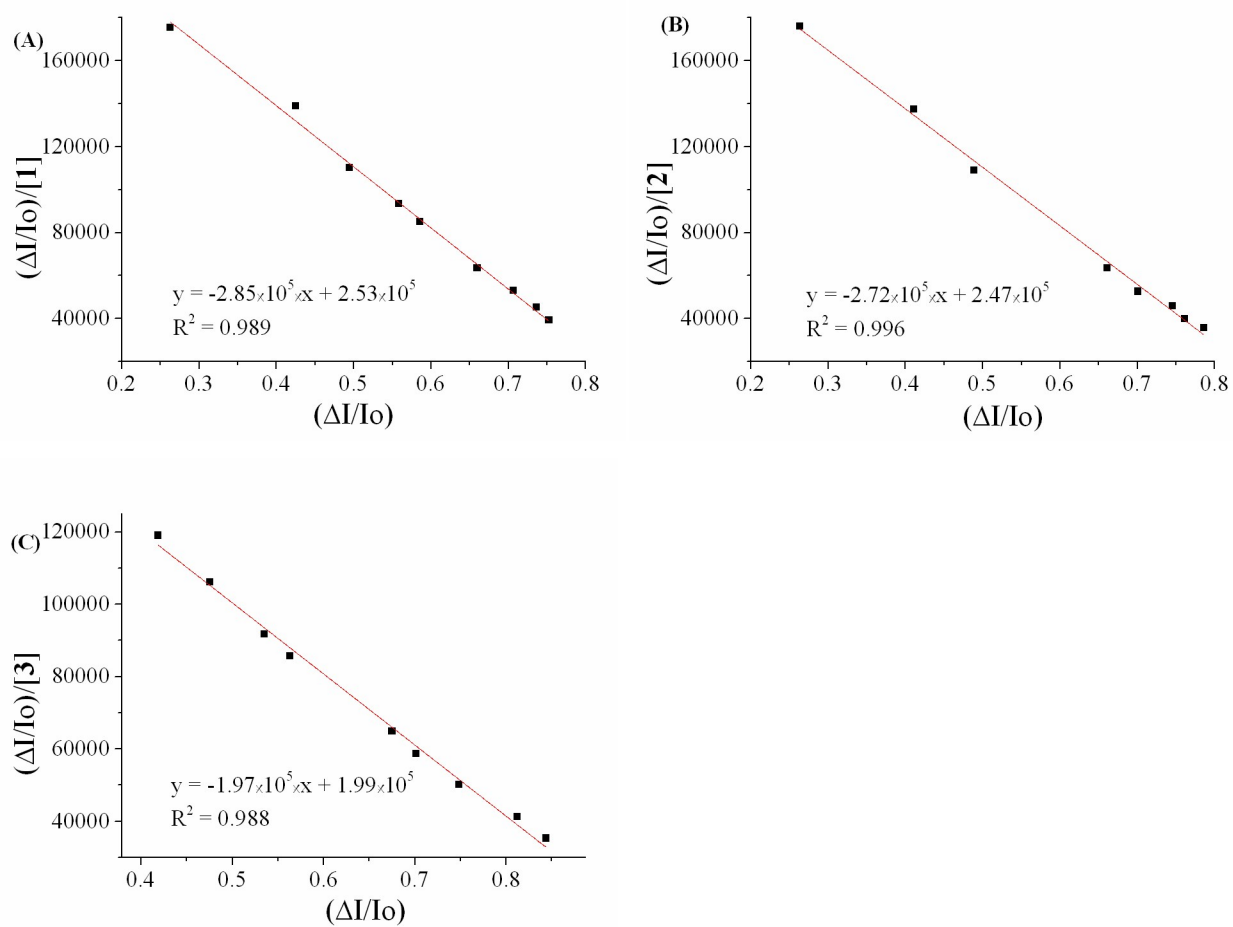

**Figure S14.** (A)–(C) Scatchard plot of HSA for complexes 1–3, respectively.

**Table S1.** Hydrogen bonding parameters of complexes **2** and **3**; D= donor, A= acceptor.

| D-H...A                   | D-H (Å) | D...A (Å) | H...A (Å) | <D-H...A (°) | Equivalent positions |
|---------------------------|---------|-----------|-----------|--------------|----------------------|
| <b>Complex 2</b>          |         |           |           |              |                      |
| N1-H...O1                 | 0.90    | 2.968(3)  | 2.10      | 161          |                      |
| O1W-H...O1                | 0.76(3) | 2.832(3)  | 2.09(3)   | 164(3)       |                      |
| N3-H...O1                 | 0.84(3) | 2.611(2)  | 1.89(2)   | 143(2)       |                      |
| N2-H...O2 <sup>i</sup>    | 0.90    | 2.980(3)  | 2.10      | 165          | (i) -x,-y,1-z        |
| N2-H...O2 <sup>ii</sup>   | 0.90    | 3.098(2)  | 2.30      | 146          | (ii) x-1,y,z         |
| O1W-H...O2 <sup>iii</sup> | 0.80(3) | 2.812(3)  | 2.01(3)   | 173(3)       | (iii)-x,1-y,1-z      |
| <b>Complex 3</b>          |         |           |           |              |                      |
| N2-H...O                  | 0.79(4) | 2.651(6)  | 1.99(4)   | 140(4)       |                      |
| O1W-H...O2                | 0.87(7) | 2.726(6)  | 1.86(7)   | 171(6)       |                      |
| O1W-H...O4                | 0.74(7) | 2.752(6)  | 2.12(6)   | 142(6)       |                      |
| N4-H...O4                 | 0.80(7) | 2.632(5)  | 1.91(6)   | 149(7)       |                      |
